# Supplementary material for: Mortierella alpina CS10E4, an oleaginous fungal endophyte of Crocus sativus L. enhances apocarotenoid biosynthesis and stress tolerance in the host plant
Source: PubMed Central journal article supplement (PMC5561177; doi:10.1038/s41598-017-08974-z), 2017-08-17

***Mortierella alpina* (CS10E4), an oleaginous fungal endophyte of *Crocus sativus* L. enhances apocarotenoid biosynthesis and stress tolerance in host plant.**

**Zahoor Ahmed Wani<sup>1,2</sup>, Amit Kumar<sup>3</sup>, Phalistineen Sultan<sup>1</sup>, Kushal Bindu<sup>3</sup>, Syed Riyaz-Ul-Hassan<sup>2,4\*</sup>, Nasheeman Ashraf<sup>1,2\*</sup>**

<sup>1</sup>Plant Biotechnology Division, CSIR-Indian Institute of Integrative Medicine, Sanat Nagar, Srinagar-190005, India

<sup>2</sup>Academy of Scientific and Innovative Research, CSIR-Indian Institute of Integrative Medicine, Canal Road, Jammu Tawi-180001, India

<sup>3</sup>Instrumentation Division, CSIR-Indian Institute of Integrative Medicine, Canal Road, Jammu Tawi-180001, India

<sup>4</sup>Microbial Biotechnology Division, CSIR-Indian Institute of Integrative Medicine, Canal Road, Jammu Tawi-180001, India

**\*Corresponding author:**

Nasheeman Ashraf  
E mail: nashraf@iiim.ac.in  
Phone number: +91 9797011714; Fax: +91-194-2441331

**\*Co-corresponding author:**

Syed Riyaz-Ul-Hassan  
E mail: srhassan@iiim.ac.in  
Phone number: +91 9419285434

**Table S1: Sequence of the primers used in qPCR studies**

| Gene   | Forward primer (5'---->3')    | Reverse primer (5'---->3')  |
|--------|-------------------------------|-----------------------------|
| PS     | TTC CCG TCA TGG GAA TTG CAC C | AAG GCC TGA TTG TGC AAG CTC |
| PDS    | TAG CTG AGT CAT GGA ATA CTC   | TTG CGC GGA GTG AGA AGT GC  |
| BCH    | ATGGGCCCCACAGGGAACCG          | GGA GGG CCC TTT CGA GCT CAA |
| CCD4   | ATCTCATCACCCGACACTCC          | TTG GGT TGG GAC CGT TGC GG  |
| CCD2   | GTCAGTTGAGTTCTGCAGAGGT        | TAGAGTAAAGTGGAATTCAAT       |
| PDF1.2 | GATGGTGAGAGTGGAGGGTCG         | GCCGGCCTATTCTGGGCAAGGC      |
| PR10   | AGCACAGCCGTATCCGGTGG          | CCTCCGTTGCTTGCTGCCTC        |
| 18S    | ACGAAACCCCGGCGCAGTGGGC        | TCGCTACGTTCTTCATCGATGCG     |

**Table S2: Anatonistic activity of *M. alpina* CS10E4 against common pathogens of *Crocus sativus* by dual culture plate assay.**

Percentage (%) growth inhibition of common fungal pathogens by endophytic strain *M. alpina* CS10E4

| <i>Fusarium oxysporium</i> (MTCC-1755) | Fusium oxysporum R1 | <i>Sclerotina</i> sp. (MTCC-7114) | <i>Fusarium solani</i> (MTCC-350) | <i>Colletotrichum capsici</i> (MTCC-2071) | <i>Geotrichum candidum</i> (MTCC-3993) | <i>Aspergillus fumigatus</i> (MTCC-343) |
|----------------------------------------|---------------------|-----------------------------------|-----------------------------------|-------------------------------------------|----------------------------------------|-----------------------------------------|
| 56.5±1.3                               | 53.5±3.4            | 58.8±2.5                          | 41.7±2.3                          | 58.3±3.1                                  | 70.5±1.6                               | 62±2.3                                  |

**Table S3: Volatile organic compounds (VOCs) produced by *M. alpina* CS10E4 determined by GC/MS analysis.**

| <b>Compounds</b>                    | <b>Amount (%)</b> |
|-------------------------------------|-------------------|
| Cyclotetradecane                    | 0.364             |
| 2,4-Di-tert-butylphenol             | 0.413             |
| 10-Heneicosane                      | 0.632             |
| 10-Heneicosane                      | 0.692             |
| Palmitic acid, methyl ester         | 13.38             |
| Octadecatrienoic acid, methyl ester | 3.536             |
| Linoleic acid, methyl ester         | 6.595             |
| Oleic acid, methyl ester            | 9.47              |
| Stearic acid, methyl ester          | 11.561            |
| Arachidonic acid, methyl ester      | 53.357            |

**Fig. S1: CAS agar plate assay for detection of siderophore production by *M. alpina* CS10E4.** Orange halos produced indicate siderophore production by the endophytic fungus.

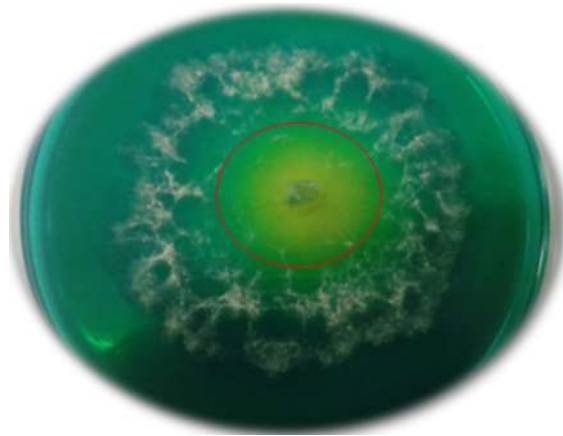

**Fig. S2: Effect of endophyte (*M. alpina* CS10E4) treatment on morphological parameters of *Crocus* plant.** Endo- means *Crocus* without endophyte treatment and Endo+ means *Crocus* with endophyte treatment.

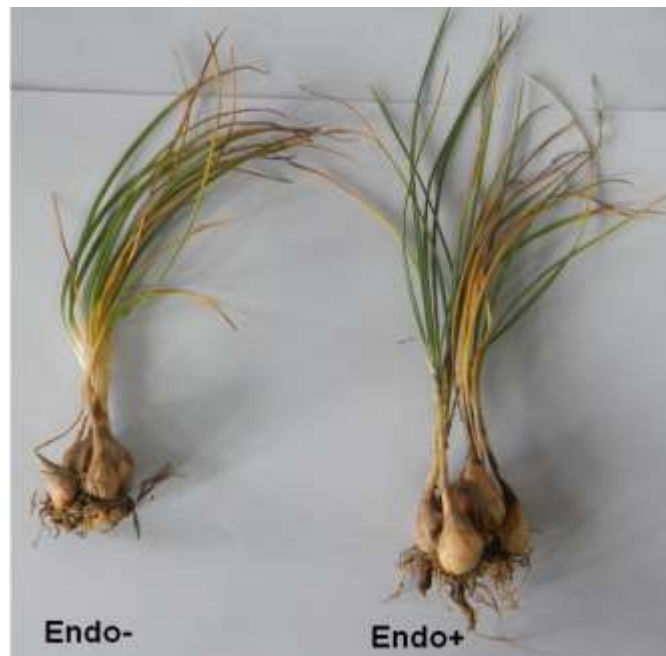

**Fig. S3: *In vitro* study for measuring disease severity index in *Crocus* corms.** (A) Where, C means control (endophyte free plants), E means only endophyte (CS10E4) treatment, P means only pathogen (*F. oxysporum* R1) treatment and E+P means pathogen treatment 3dpi of endophyte. (B) Where, AA means Arachidonic acid treatment at 50 $\mu$ M concentration, AA+P means pathogen treatment 3dpi of AA treatment, and P means only pathogen (*F. oxysporum* R1) treatment.

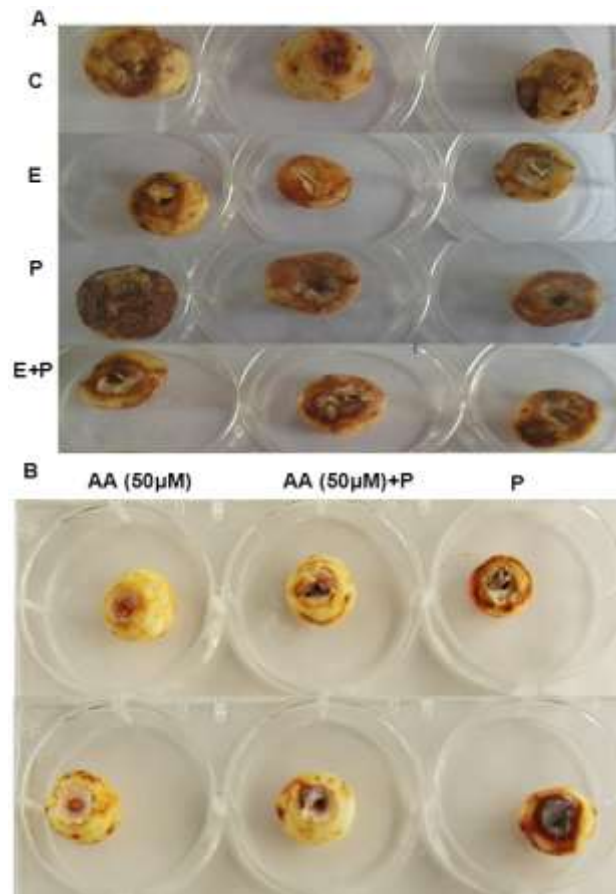

**Fig. S4: Jasmonic acid (JA) content in *Crocus* corms.** Chromatogram showing methyl jasmonate peaks in samples, where, C means control (endophyte free plants), E means only endophyte (CS10E4) treatment, P means only pathogen (*F. oxysporum* R1) treatment and E+P means pathogen treatment 3dpi of endophyte.

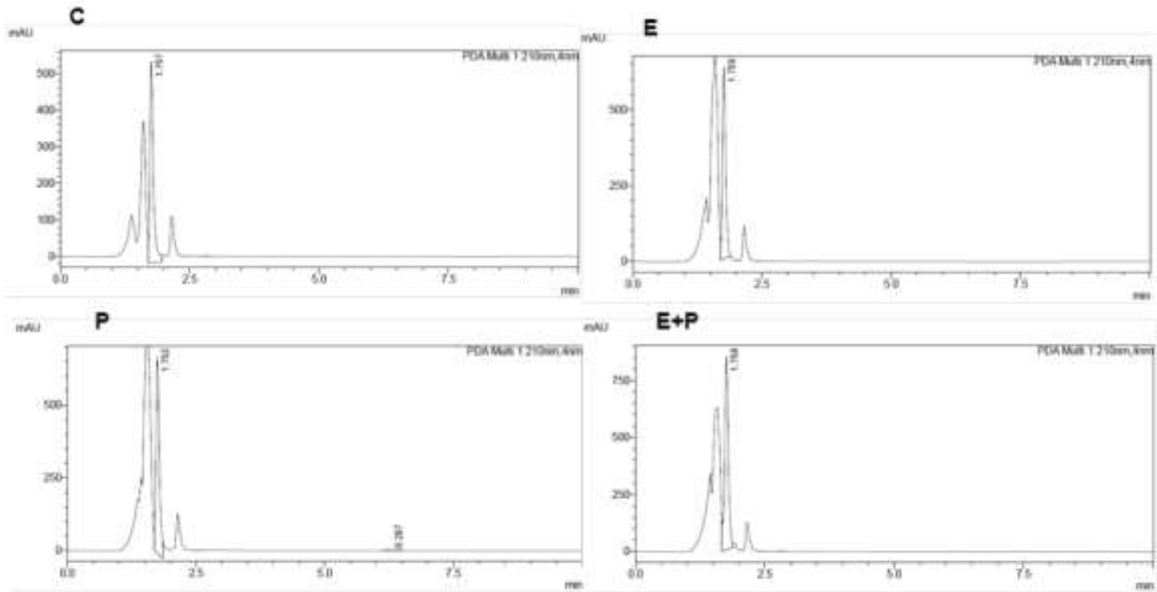

Supplement: 41598_2017_8974_MOESM1_ESM.pdf [file 41598_2017_8974_MOESM1_ESM.pdf]
